# Supplementary material for: Caffeine for the Treatment of Apnea in the Neonatal Intensive Care Unit: A Systematic Overview of Meta-Analyses
Source: Springer Nature journal article supplement (doi:10.1007/s40272-020-00404-4), 2020-06-03
Supplement: MOESM2 [file 24128784]

## Appendix 2. Search Strategies

### Embase:

| #  | Searches                                                       | Results |
|----|----------------------------------------------------------------|---------|
| 1  | exp apnea/                                                     | 28516   |
| 2  | apnea.mp.                                                      | 92077   |
| 3  | 1 or 2                                                         | 92900   |
| 4  | exp caffeine/                                                  | 49476   |
| 5  | Caffeine.mp.                                                   | 56120   |
| 6  | exp methylxanthine/                                            | 2115    |
| 7  | 4 or 5 or 6                                                    | 57486   |
| 8  | Intensive Care, Neonatal.mp. or exp newborn<br>intensive care/ | 26395   |
| 9  | exp infant/                                                    | 1128980 |
| 10 | Intensive Care, Neonatal.mp. or exp newborn<br>intensive care/ | 26395   |
| 11 | exp newborn/ or new born.mp. or exp male/                      | 9442107 |
| 12 | 8 or 9 or 10 or 11                                             | 9723181 |
| 13 | 3 and 7 and 12                                                 | 858     |
| 14 | limit 13 to (human and English language)                       | 647     |

### PubMed:

("Apnea"[Mesh] AND ("Caffeine"[Mesh] OR "Caffeine" OR "Methylxanthine") AND ("Intensive Care, Neonatal"[Mesh] OR "Infant, Newborn"[Mesh])) (N=308)
